# Supplementary material
Source: PubMed Central journal article supplement (PMC5354354)

| <b>Table E1</b> Eosinophils (cells/ $\mu$ L) pre- and post-HSCT for DOCK8 deficiency |          |                              |
|--------------------------------------------------------------------------------------|----------|------------------------------|
| Patient                                                                              | Pre-HSCT | Post-HSCT (months post-HSCT) |
| 1                                                                                    | 840      | 10 (36.2)                    |
| 3                                                                                    | 2080     | 140 (28.4)                   |
| 4                                                                                    | 2100     | 720 (33.5)                   |
| 6                                                                                    | 19540    | 450 (27.2)                   |
| 8                                                                                    | 21940    | 440 (36.0)                   |
| 9                                                                                    | 2790     | 80 (37.7)                    |
| 10                                                                                   | 2700     | 170 (22.2)                   |
| 11                                                                                   | 430      | 140 (29.7)                   |

| <b>Table E2</b> Lymphocyte subsets pre- and post-HSCT for DOCK8 deficiency |                       |             |                              |                    |
|----------------------------------------------------------------------------|-----------------------|-------------|------------------------------|--------------------|
| Subset                                                                     | Patient               | Pre-HSCT    | Post-HSCT (months post-HSCT) |                    |
| CD3+ (cells/ $\mu$ L)                                                      | 1                     | <b>485</b>  | 1566 (36.2)                  |                    |
|                                                                            | 3                     | <b>685</b>  | 2253 (28.4)                  |                    |
|                                                                            | 4                     | <b>764</b>  | 1862 (33.5)                  |                    |
|                                                                            | 5                     | <b>784</b>  | 1819 (13.4)                  |                    |
|                                                                            | 6                     | <b>980</b>  | 2165 (27.2)                  |                    |
|                                                                            | 8                     | 2760        | 1570 (23.4)                  |                    |
|                                                                            | 9                     | 1350        | 2459 (37.7)                  |                    |
|                                                                            | 10                    | 2550        | 3110 (22.0)                  |                    |
|                                                                            | 11                    | <b>2015</b> | 2182 (29.7)                  |                    |
|                                                                            | CD4+ (cells/ $\mu$ L) | 1           | <b>295</b>                   | 870 (36.2)         |
|                                                                            |                       | 3           | <b>205</b>                   | 1065 (28.4)        |
| 4                                                                          |                       | <b>247</b>  | <b>489 (33.5)</b>            |                    |
| 5                                                                          |                       | <b>591</b>  | 1300 (13.4)                  |                    |
| 6                                                                          |                       | <b>433</b>  | 923 (27.2)                   |                    |
| 8                                                                          |                       | 1010        | 890 (23.4)                   |                    |
| 9                                                                          |                       | 1045        | 1310 (37.7)                  |                    |
| 10                                                                         |                       | 2240        | 1510 (22.0)                  |                    |
| 11                                                                         |                       | <b>889</b>  | 988 (29.7)                   |                    |
| CD8+ (cells/ $\mu$ L)                                                      |                       | 1           | <b>186</b>                   | 648 (36.2)         |
|                                                                            |                       | 3           | <b>405</b>                   | 1072 (28.4)        |
|                                                                            | 4                     | 397         | 1025 (33.5)                  |                    |
|                                                                            | 5                     | <b>159</b>  | 451 (13.4)                   |                    |
|                                                                            | 6                     | 449         | 1022 (27.2)                  |                    |
|                                                                            | 8                     | 1650        | 570 (23.4)                   |                    |
|                                                                            | 9                     | <b>295</b>  | 1049 (37.7)                  |                    |
|                                                                            | 10                    | <b>310</b>  | 1360 (22.0)                  |                    |
|                                                                            | 11                    | 1061        | 1098 (29.7)                  |                    |
|                                                                            | CD4/CD8               | 1           | 1.59                         | 1.34 (36.2)        |
|                                                                            |                       | 3           | <b>0.51</b>                  | <b>0.99 (28.4)</b> |
| 4                                                                          |                       | <b>0.62</b> | <b>0.48 (33.5)</b>           |                    |
| 5                                                                          |                       | 3.72        | 2.88 (13.4)                  |                    |
| 6                                                                          |                       | <b>0.96</b> | 0.89 (27.2)                  |                    |
| 8                                                                          |                       | <b>0.61</b> | 1.56 (23.4)                  |                    |
| 9                                                                          |                       | 3.54        | 1.25 (37.7)                  |                    |
| 10                                                                         |                       | 7.23        | 1.11 (22.0)                  |                    |
| 11                                                                         |                       | <b>0.84</b> | 0.90 (29.7)                  |                    |
| CD19+ (cells/ $\mu$ L)                                                     |                       | 1           | 1426                         | 385 (36.2)         |
|                                                                            |                       | 3           | 272                          | 1209 (28.4)        |
|                                                                            | 4                     | <b>127</b>  | 640 (33.5)                   |                    |
|                                                                            | 5                     | <b>495</b>  | 758 (13.4)                   |                    |
|                                                                            | 6                     | <b>208</b>  | 944 (27.2)                   |                    |
|                                                                            | 8                     | 1750        | 660 (23.4)                   |                    |
|                                                                            | 9                     | 518         | 686 (37.7)                   |                    |
|                                                                            | 10                    | 2040        | 1166 (22.2)                  |                    |
|                                                                            | 11                    | 2306        | <b>317 (29.7)</b>            |                    |

|                                        |    |             |                    |
|----------------------------------------|----|-------------|--------------------|
| CD56/16+ (cells/ $\mu$ L)              | 1  | 161         | 135 (36.2)         |
|                                        | 3  | <b>37</b>   | 132 (28.4)         |
|                                        | 4  | 130         | 350 (33.5)         |
|                                        | 5  | <b>126</b>  | <b>79 (13.4)</b>   |
|                                        | 6  | 349         | 168 (27.2)         |
|                                        | 8  | 580         | 170 (23.4)         |
|                                        | 9  | 214         | 187 (37.7)         |
|                                        | 10 | <b>100</b>  | 535 (22.2)         |
|                                        | 11 | <b>151</b>  | <b>80 (29.7)</b>   |
|                                        |    |             |                    |
| CD4+CD45RA+ (%)                        | 1  | <b>48.8</b> | 56.5 (36.2)        |
|                                        | 4  | <b>0.2</b>  | 45.5 (33.5)        |
|                                        | 5  | 73.1        | 55 (13.4)          |
|                                        | 6  | 56.3        | <b>44.4 (27.2)</b> |
|                                        | 8  | 59          | 51.3 (23.4)        |
|                                        | 10 | 78.2        | <b>36 (22.0)</b>   |
|                                        | 11 | <b>56.3</b> | 56.1 (29.7)        |
|                                        |    |             |                    |
| CD8+CD45RA+ (%)                        | 1  | <b>6.1</b>  | 78.4 (36.2)        |
|                                        | 4  | <b>0.9</b>  | 76.1 (33.5)        |
|                                        | 6  | <b>6.8</b>  | 80.2 (27.2)        |
|                                        | 8  | 86          | <b>50 (23.4)</b>   |
|                                        | 10 | 85.8        | <b>47 (22.0)</b>   |
|                                        | 11 | <b>3.5</b>  | <b>47.1 (29.7)</b> |
|                                        |    |             |                    |
| CD19+CD27+IgD- (%)                     | 1  | <b>0.6</b>  | <b>3 (36.2)</b>    |
|                                        | 3  | <b>0.8</b>  | <b>2.5 (28.4)</b>  |
|                                        | 6  | <b>2.4</b>  | <b>9.2 (27.2)</b>  |
|                                        | 11 | <b>0.6</b>  | 13.7 (29.7)        |
|                                        |    |             |                    |
| CD19+CD27+IgD+ (%)                     | 1  | <b>2.1</b>  | <b>4.2 (36.2)</b>  |
|                                        | 3  | <b>1</b>    | <b>3.6 (28.4)</b>  |
|                                        | 6  | <b>3.4</b>  | 7 (27.2)           |
|                                        | 11 | <b>2.4</b>  | 13.8 (29.7)        |
| Bold values are abnormally low for age |    |             |                    |

**FIG E1.** DOCK8 expression by flow cytometry in peripheral blood cells. A, Control and patient P4, pre-HSCT. B, Control and P7 (post-rituximab) pre-HSCT. *Shaded histograms* indicate isotype control.

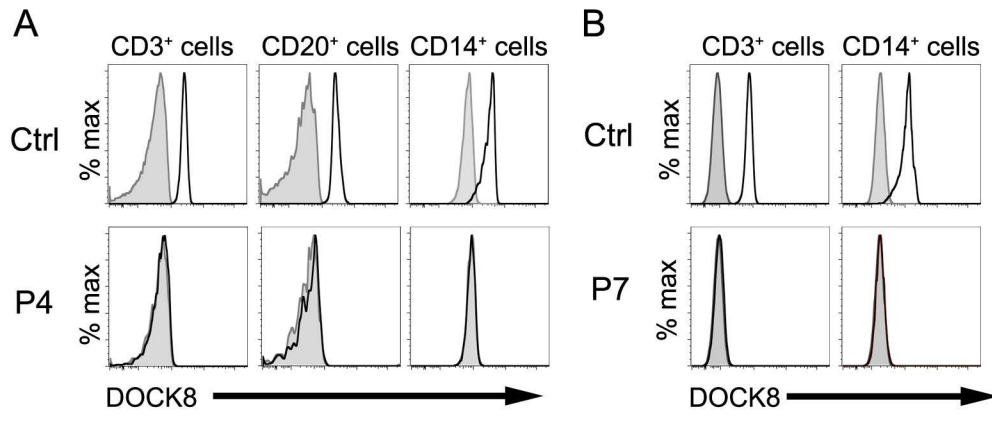

Supplement: NIHMS782218-supplement-supplement_1.pdf [file NIHMS782218-supplement-supplement_1.pdf]
